# Supplementary material for: Exploring the Association between Elevated Anxiety Symptoms and Low Skeletal Muscle Mass among Asymptomatic Adults: A Population-Based Study in Republic of Korea
Source: MDPI journal article supplement (doi:10.3390/brainsci14050438), 2024-04-28
Supplement: s1 [file s1]

# Supplementary Table S1

Prevalence of clinical anxiety symptoms in control and low skeletal muscle mass.

|         | Total          | Anxiety level (CUXOS score) |               | <i>p</i> -value |                 |
|---------|----------------|-----------------------------|---------------|-----------------|-----------------|
|         |                | ≤20                         | >20           |                 |                 |
| Total   |                |                             |               | <0.001***       |                 |
| Control | 155493 (89.23) | 119510 (76.86)              | 35983 (23.14) |                 |                 |
| LMM     | 18769 (10.77)  | 13072 (69.65)               | 5697 (30.35)  |                 |                 |
| Female  |                |                             |               | <0.001***       |                 |
| Control | 58942 (79.83)  | 41159 (69.83)               | 17783 (30.17) |                 |                 |
| LMM     | 14891 (20.17)  | 10015 (67.26)               | 4876 (32.74)  |                 |                 |
| Male    |                |                             |               | <0.001***       |                 |
| Control | 96551 (96.14)  | 78351 (81.15)               | 18200 (18.85) |                 |                 |
| LMM     | 3878 (3.86)    | 3057 (78.83)                | 821 (21.17)   |                 |                 |
|         |                | Anxiety level (CUXOS score) |               |                 |                 |
|         |                | ≤20                         | 21-30         | >30             | <i>p</i> -value |
| Total   |                |                             |               |                 | <0.001***       |
| Control | 119510 (76.86) | 23412 (15.06)               | 12571 (8.08)  |                 |                 |
| LMM     | 13072 (69.65)  | 3427 (18.26)                | 2270 (12.09)  |                 |                 |
| Female  |                |                             |               |                 | <0.001***       |
| Control | 41159 (69.83)  | 10858 (18.42)               | 6925 (11.75)  |                 |                 |
| LMM     | 10015 (67.26)  | 2890 (19.41)                | 1986 (13.34)  |                 |                 |
| Male    |                |                             |               |                 | <0.001***       |
| Control | 78351 (81.15)  | 12554 (13.00)               | 5646 (5.85)   |                 |                 |
| LMM     | 3057 (78.83)   | 537 (13.85)                 | 284 (7.32)    |                 |                 |
|         |                | Anxiety level (CUXOS score) |               |                 | <i>p</i> -value |
|         |                | ≤20                         | 21-40         | >40             |                 |
| Total   |                |                             |               |                 | <0.001***       |
| Control | 119510 (76.86) | 32595 (20.96)               | 3388 (2.18)   |                 |                 |
| LMM     | 13072 (69.65)  | 5035 (26.83)                | 662 (3.53)    |                 |                 |
| Female  |                |                             |               |                 | <0.001***       |
| Control | 41159 (69.83)  | 15748 (26.72)               | 2035 (3.45)   |                 |                 |
| LMM     | 10015 (67.26)  | 4281 (28.75)                | 595 (4.00)    |                 |                 |
| Male    |                |                             |               |                 | 0.001           |
| Control | 78351 (81.15)  | 16847 (17.45)               | 1353 (1.40)   |                 |                 |
| LMM     | 3057 (78.83)   | 754 (19.44)                 | 67 (1.73)     |                 |                 |

Data are presented as numbers (percentages). P values for the between-group difference by Chi-square test. \*\*\*P value < 0.001

CUXOS = Clinically Useful Anxiety Outcome Scale, LMM = low skeletal muscle mass.
